# Supplementary material for: Application of anisotropy of magnetic susceptibility (AMS) fabrics to determine the kinematics of active tectonics: Examples from the Betic Cordillera, Spain and the northern Apennines, Italy
Source: Copernicus journal article supplement (doi:10.5194/se-2020-184), 2021-01-20
Supplement: Supplementary file [file se-2020-184-RC1-supplement.pdf]

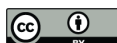

# Application of anisotropy of magnetic susceptibility (AMS) fabrics to determine the kinematics of active tectonics: Examples from the Betic Cordillera, Spain and the northern Apennines, Italy.

David J. Anastasio<sup>1</sup>, Frank J. Pazzaglia<sup>1</sup>, Josep M. Parés<sup>2</sup>, Kenneth P. Kodama<sup>1</sup>, Claudio Berti<sup>3</sup>, James A. Fisher<sup>1</sup>, Alessandro Montanari<sup>4</sup>, Lorraine K. Carnes<sup>5</sup>

<sup>1</sup> Department of Earth and Environmental Sciences, Lehigh University, Bethlehem, PA, 18015-3001, United States  
<sup>2</sup> Geochronology, Centro Nacional de Investigación de la Evolución Humana (CENIEH) Burgos, 09002, Spain  
<sup>3</sup> Idaho Geological Survey, Moscow, ID, 83844-3014, United States  
<sup>4</sup> Osservatorio Geologico di Coldigioco, Airolo MC, 62021, Italy  
<sup>5</sup> Arizona State University, Tempe, AZ, 85281, United States

Correspondence to: David J. Anastasio (dja2@lehigh.edu)

**Abstract:** The anisotropy of magnetic susceptibility (AMS) technique provides an effective way to measure fabrics and in the process, interpret the kinematics of actively deforming orogens. We collected rock fabric data of alluvial fan sediments surrounding the Sierra Nevada massif, Spain, and a broader range of Cenozoic sediments and rocks across the northern Apennine foreland, Italy, to explore the deformation fabrics that contribute to the ongoing discussions of orogenic kinematics. Sierra Nevada is a regional massif in the hinterland of the Betic Cordillera. We recovered nearly identical kinematics regardless of specimen magnetic mineralogy, structural position, crustal depth, or time. The principal elongation axes are NE-SW in agreement with mineral lineations, regional GPS geodesy, and seismicity results. The axes trends are consistent with the convergence history of the Africa-Eurasia plate boundary. In Italy, we measured AMS fabrics of specimens collected along a NE-SW corridor spanning the transition from crustal shortening to extension in the northern Apennines. Samples have AMS fabrics compatible only with shortening in the Apennine wedge and have locked in penetrative contractional fabrics, even for those samples that were translated into the actively extending domain. In both regions we found that specimens have a low degree of anisotropy and oblate susceptibility ellipsoids that are consistent with tectonic deformation superposed on compaction fabrics. Collectively, these studies demonstrate the novel ways that AMS can be combined with structural, seismic, and GPS geodetic data to resolve orogenic kinematics in space and time.

## 1 Introduction

A number of *circum*-Mediterranean orogens are associated with rapid slab rollback, resulting in paired compressional and extensional domains in the orogenic wedge of the retreating upper plate (Elter, 1975, Carminati and Doglioni, 2012). Examples include, the Calabria Arc-Tyrrhenian Sea (Beccaluva et al. 1985; Milia et al 2009), the Hellenic Arc-Aegean Sea (Pichon and Angelier 1979; Papazachos et al. 2000), and the Gibraltar Arc-Alboran Sea (Lonergan and White 1997; Platt et al. 2006; Fernández-Ibáñez and Soto 2008). Along these tectonic boundaries, the temporal and spatial relationship between thrust belt contraction, wedge-top basin evolution,

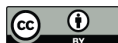

hinterland extension, and orogenic uplift are the subjects of continuing controversy. Finite and incremental strain data provide deformation history and fabric distribution information for kinematic studies of folds, faults, and orogens (e.g., Cloos, 1947; Ramsay and Huber, 1984; Fischer et al., 1992). However, in orogenic forelands where deformation occurs at shallow depths and low temperatures, ductile penetrative deformation features may be absent and brittle structures may be sparse. Anisotropy of magnetic susceptibility (AMS) results offers an alternative proxy for grain preferred orientation, and hence rock strain, to determine the tectonic fabric in these orogens where other deformation markers are not available (Borradaile and Jackson, 2004; 2010; Borradaile and Henry, 1997; Averbuch et al., 1992; Pares, 2004). In general, comparative studies from siliciclastic rocks show good agreement between both the relative magnitude and orientation of penetrative rock strain determined by traditional geometric methods and AMS principal axes. The AMS axes in specimens dominated by diamagnetic magnetic mineral abundance, the AMS axes orientations and not necessarily the magnitude correlates to the rock strain. (e.g., Latta and Anastasio, 2007; Burneister et al., 2009). In this paper, we show how AMS can extend the temporal reach of GPS geodesy and seismic first motion assessments back in time in orogenic studies of the Betic Cordillera, Spain and in the northern Apennines, Italy (Fig. 1).

## 2 Kinematic Studies For Active Tectonic Research

Sedimentary rocks acquire a primary depositional fabric, which is bedding-parallel. It is measurable with the AMS technique and is further enhanced and modified during burial, compaction, and water loss (e.g., Tarling and Hrouda, 1993; Schwehr et al., 2006). Even unconsolidated rocks record a magnetic fabric that can potentially provide a kinematic record (Mattei et al., 1997; Porreca and Mattei, 2012). The sensitivity of AMS allows its use as a paleogeodetic tool in tectonic studies. Kinematics allow for an assessment of rheology and strain history that are necessary prerequisites for understanding geodynamics, incrementally balancing cross sections, or in paleogeographic reconstructions. We sampled both consolidated sedimentary rocks and unconsolidated sediments in the Betic Cordillera, Spain and northeastern Apennine ranges, Italy for AMS analysis. The Betics field sampling was designed to test AMS recovery from unburied and unconsolidated sediments around the Sierra Nevada massif. Here, oriented samples were collected from sites at all structural positions around the Sierra Nevada massif in Plio-Pleistocene terrestrial, siliciclastic deposits (Table A1). The Apennines field sampling was designed to measure the rotation of strain across the foreland as rock passes from the actively shortening part of the orogenic wedge near the trench to the actively extending regime further to the southwest. Here, oriented samples were collected from sites along a NE-SW oriented corridor inclusive of Cenozoic (Table A1) marine and fluvial siliciclastics, marls, and carbonate rocks, and unconsolidated Pleistocene fluvial sediments.

## 3 The AMS Method

The AMS ellipsoid is defined by the principal axes ( $k_1$ -maximum,  $k_2$ -intermediate,  $k_3$ -minimum) of a specimen. It can be represented by a second-rank tensor that characterizes a material's magnetization response to an applied magnetic field (e.g., Borradaile and Tarling, 1981; Tarling and Hrouda, 1993). The orientation and relative length of the principal anisotropy axes of a specimen are controlled by the preferred alignment of the anisotropy axes of the



individual magnetic particles in the specimen and the degree of the individual particle's anisotropy. The anisotropy of individual magnetic grains is controlled by their crystallography and grain shape (Tarling and Hrouda, 1993). For magnetite grains, the anisotropy is controlled by grain shape, whereas for hematite and phyllosilicate particles the anisotropy is controlled by crystallography, which, in turn, controls their shape.

Natural processes such as current deposition, lithification, and tectonic deformation all contribute to a specimen's AMS. In deformed rocks, it was shown that the principal susceptibility axis ( $k_1$ ) orientation is typically parallel to the strain long axis and orthogonal to the tectonic shortening direction, whereas the shortest axis ( $k_3$ ), is orthogonal to bedding in orientation (e.g., Kligfield et al., 1982; Hrouda, 1982), regardless of whether the individual particle anisotropy is controlled by crystallography or shape.

The sedimentary rocks and deposits in this study contain enough phyllosilicate minerals to be excellent specimens for AMS studies because of the presence of oblate mineral grains which adjust readily to deposition, lithification, and any subsequent deformation. As grains reorient in response to depositional or tectonic processes, the magnetic fabric will continuously adjust (Parés and van der Pluijm, 2002). Deposition from currents in alluvial fans or rivers like the examples discussed here, will cause preferred grain alignment. Because the intermediate and maximum AMS axes of platy grains, such as phyllosilicates, are nearly equal in magnitude they will be randomly oriented in bedding, with the minimum axes orthogonal to bedding. In mudstones and fine grained sandstones, where both paramagnetism and ferromagnetism contributions were quantified, paramagnetic mineral grains typically dominate the AMS signal (Martin-Hernández and Hirt, 2001) because of the shape anisotropy of clay minerals, although very fine magnetic particles attached to the clay fabric might also contribute (Kodama and Sun, 1992).

#### 4 Example I: Sierra Nevada Massif, Spain

##### 4.1 Geologic Setting of Sierra Nevada Massif

The Sierra Nevada massif is part of the Betic Cordillera-Rif-Tell orogens that extend along the European-African plate boundary from the southern Iberian peninsula to northern Africa. These orogens are controlled by slab rollback and western migration of the Gibraltar Arc throughout the Neogene (Rosenbaum et al., 2002). Coincident with the translation of the arc, the upper plate experienced shortening, the growth of doubly-vergent thrust belts, crustal thickening, and rock uplift (Duggen et al., 2003; Soto et al., 2008; Platt et al., 2013). In the Betics, contraction across the plate boundary was initially directed northward (Sanz De Galdeano, 1990; Lonergan, 1993; Platt et al., 2013). As the contraction continued into the foreland during the late Miocene, it slowed and progressively rotated to the northwest into its present orientation (Mazzoli and Helman, 1994; Rosenbaum et al., 2002). Active tectonics in the Betic Cordillera today is dominated by distributed NW-SE convergence of 4-6 mm/yr (Fernandez-Ibanez et al., 2007; Koulali et al., 2011; Gutshcer et al. 2012; Mancilla et al., 2013) and is accommodated in part on NW-SE trending normal faults (Martínez- Martínez et al., 2006; Stich et al., 2006; Fernández-Ibáñez and Soto, 2008; Giaconia et al., 2014; 2015; Fig. 2).

The Sierra Nevada massif is a doubly-plunging, actively uplifting (Azañón et al., 2015) elongate dome, characterized by medium to low-grade metamorphic rocks stacked in north verging thrust sheets (Martínez-Martínez and Soto, 2002). Previous interpretations are that the Sierra Nevada dome was uplifted following top to the west



extension and isostatic rebound after thrust belt formation (Martinez-Martinez et al., 2006). Alternatively, as many culminations exist in orogenic hinterlands, the massif could have been uplifted during contractional or transpressive strain (e.g., Bernini, 1990; Mitra et al., 1997).

To resolve whether the uplift of the Sierra Nevada dome was the result of extensional exhumation or a compressional orogenic culmination, we collected rock fabric (AMS) data in Plio-Pleistocene deposits around the massif to explore the presence of penetrative tectonic fabrics that can contribute additional constraints to the kinematics of dome emplacement. We focused sampling on unburied alluvial fan deposits in Neogene basins that surround the core of the structure (Fig. 3).

#### 4.2 Methods for Example I

We collected samples from 6 sites distributed around Sierra Nevada, from all structural positions, around the massif in unburied Plio-Pleistocene fan deposits that range from poorly cemented to unconsolidated (Sanz de Galdeano and Vera, 1992; DR Table 1; Fig. 3). The ages of the deposits sampled were determined from published geologic maps (IGME-1:50,000 scale) and bridged the temporal gap between the late Miocene age metamorphic fabrics and the present day deformation field recorded by GPS geodesy and recent seismicity. At each site, three oriented samples were collected as independent blocks. Before removal from the outcrop, most blocks were hardened with a diluted (~50%) aqueous solution of sodium silicate (Fig. 4). In the laboratory, 2-3, oriented cubes (8cm<sup>3</sup>) were cut from each block using non-magnetic Teflon knives and enclosed in standard cubic paleomagnetic boxes. The anisotropy of magnetic susceptibility (AMS) was determined with an Agico Kappabridge KLY-3S at Lehigh University. To determine magnetic mineralogy, a heating stage under the presence of an argon atmosphere and a cold stage accessory to the Kappabridge was used.

#### 4.3 Results for Example I

Results from heating and cooling experiments show a complicated magnetic mineralogy composed of 100% ferromagnetic (magnetite or hematite) to 100% paramagnetic mineralogy (clays and iron-rich micas; Fig. 5). Since the kinematic interpretation of each of the specimen is the same regardless of magnetic mineralogy, the details of each specimen are not important for subsequent analysis. There is no correlation between the bulk magnetic susceptibility ( $k_m$ ) and the anisotropy of the magnetic ellipsoid ( $P_j$ ), so a comparison of the principal axis of susceptibility across the various structural positions around the Sierra Nevada massif specimens can provide useful kinematic information (Fig. 6a). Nearly all AMS ellipsoids are characterized by a low anisotropy degree ( $P_j$ ) and oblate ellipsoid shape (T) (Jelinek, 1981; Fig. 6b). The AMS axes determinations record nearly the same axis orientations. At all sites around Sierra Nevada,  $k_3$  is nearly orthogonal to bedding. The principal elongation axes means is preferentially oriented NNE-SSW to NE-SW (Fig. 3). The orientation of the site mean magnetic susceptibility axes,  $k_1$ , is horizontal or very shallowly plunging to the NE or SW (Fig 3).

#### 4.4 Discussion of Example I

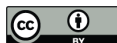

The AMS principal axes show a consistency between sites (Fig. 3), so we combine the susceptibility axes orientation data in Figure 7. These combined data suggest that during deposition the phyllosilicate grains were oriented with their basal planes parallel or slightly imbricated to the depositional surface. Compaction during dewatering and lithification amplified the initial oblate depositional fabric and was coincident with the formation of the tectonic fabric. Regardless of the magnetic mineralogy of the specimens, a well-clustered minimum susceptibility axis ( $k_3$ ) is present, which we interpret as a compaction fabric in these sedimentary deposits. The possibility of a primary depositional current fabric (imbrication) is unlikely because of an independent paleocurrent study on clast imbrication at Site 3 and Site 4, which shows an eastward rather than westward transport direction during deposition (Carrigan et al., 2018).

Irrespective of the structural position around the Sierra Nevada massif, all sites show a preferred orientation of  $k_1$ . The mean principal axis of maximum susceptibility is preferentially oriented at  $030^\circ$ – $210^\circ$  (Figs. 7 and 8). We interpret this as a tectonic fabric due to the tight clustering of  $k_1$  and  $k_2$ , the relationship between  $k_1$  and strike of dipping bedding at sites SN1, SN4, and SN6, and the lack of influence from sedimentary processes. In specimens dominated by phyllosilicate grains it is difficult to create a strong lineation by aligning grain crystallographic axes, however, an intersection lineation between slightly rotated clay grains orthogonal to a shortening direction has been observed (Henry, 1997; Parés et al., 2007; Martín-Hermández and Ferré, 2007; Borradaile and Jackson, 2010). The orientation of  $k_1$  is consistent with the present day GPS velocity field, being oriented almost perfectly orthogonal to the direction of convergence of the Betic Cordillera to stable Africa (Nubia; Fig. 2; Gutscher et al., 2012), in good agreement with the mineral lineations recorded in the massif's core (Martínez-Martínez and Soto, 2002), and the Neogene brittle extensional structures and recent seismicity (Mancilla et al., 2013) in the orogen (Fig. 2). Because of the low strains and the orthogonal relationship between contractional and extensional principal directions it is not possible to distinguish the uplift processes of the Sierra Nevada massif with our results. The AMS ellipsoid orientations, mineralogical stretching lineation from the core of the Sierra Nevada massif, the nearby GPS velocity field, and recent fault slip, all have orientations consistent with the same strain field (Fig. 8). The principal elongation direction is interpreted to have persisted across different structural levels from Miocene time to the present ( $> 10$  m.y.).

## 5 Example II: Northern Apennines, Italy

### 5.1. Geologic Setting of the Northern Apennines

The northern Apennines are an accretionary fold and thrust belt (Bally, et al., 1986) where crustal deformation, rock uplift, and topographic growth result from the ongoing subduction of Adria beneath Europe (Picotti and Pazzaglia, 2008; Carminati and Doglioni, 2012). The Apennine orogenic wedge initiated  $\sim 30$  Ma along the southern flank of the Alps (Le Pichon et al., 1971), and has grown at variable rates through the Neogene deposited on the flux of mass imbricated from the subducting plate (Picotti and Pazzaglia, 2008). Rapid rollback of Adria with respect to Europe results in retreat and stretching of the upper plate, forming a wide zone of back arc crustal extension. The Apennine wedge started to become emergent  $\sim 4$  Ma (Picotti and Pazzaglia, 2008) uplifting and exposing paired compressional and extensional deformation fronts near the trench and in the hinterland



187 respectively, with the structural transition near the topographic culmination of the range (D'Agostino et al., 2001;  
 188 Carminati and Doglioni, 2012). Balanced cross-sections for the Apennines (Bally et al., 1986; Hill and Hayward,  
 189 1988) indicate ~130 to 150 km of subduction over the 30 m.y. history of the wedge, which indicates relatively slow  
 190 long-term rates at ~ 4 to 5 km/m.y. (4 – 5 mm/yr), similar to the GPS geodetic rates (Devoti et al., 2008; Caporali et  
 191 al., 2011; Bennett et al., 2012).

192 The northeastern Apennines, including the Umbria-Marche target region of this research, exposes  
 193 Mesozoic-early Cenozoic carbonates and middle-late Cenozoic mixed carbonate-siliciclastic rocks folded and  
 194 imbricated into northeast-vergent thrust sheets (Fig. 9). In Marche, these thrust sheets are located with carbonate  
 195 ridges and have inferred blind thrusts in their cores (Artori, 2013). Further west in Umbria, the thrust sheets are  
 196 dissected by both east- and west-dipping high angle normal faults (Barchi et al., 1998; Fig. 9). Ongoing thrust  
 197 earthquakes beneath the Po Plain and Adriatic Sea (Pondrelli et al., 2006; Boccaletti et al., 2011) and normal-fault  
 198 sense earthquakes beneath the high Apennines (Lavecchia et al., 1994; Doglioni et al., 1999; Ghisetti and Vezzani,  
 199 2002; Chiaraluce et al., 2017) speak to concurrent shortening and extension in the wedge.

200 The paired deformation fronts in the northern Apennines  are convolved with an enigmatic, but active,  
 201 east-dipping (towards Adria), 14-15 km deep detachment called the Alto-Tiberina fault, that projects to the surface  
 202 west of the Apennine crest (Barchi et al., 1998; Piali et al., 1998; Boncio et al., 2004; Chiaraluce et al., 2007; Eva et  
 203 al., 2014; Lavecchia et al., 2016; Fig. 9). This detachment is one of only a handful of low angle normal faults  
 204 globally that are demonstrably seismogenic (Hreinsdottir and Bennett, 2009; Valoroso et al., 2017), apparently in  
 205 contradiction to frictional fault reactivation theory that predicts that slip on low angle normal faults as extremely  
 206 unlikely (reviewed in Collettini, 2011). Most of the destructive seismicity in the high Apennines tends to nucleate  
 207 on west-dipping high angle normal faults that are antithetic to and sole into this east-dipping detachment (Galadini  
 208 and Galli, 2000; Boncio et al., 2004; Roberts and Michetti, 2004). The most destructive seismicity, including the  
 209 2016-17 earthquake sequence, is tightly focused along the highest crest of the Apennines where it is co-located with  
 210 young, underfilled, extensional basins, high angle normal faults that rupture the surface (Fig. 9), and geomorphic  
 211 evidence for an east-marching drainage divide. It is not known if the infrequent, but large historic earthquakes east  
 212 of the divide are indicative of new blind normal faults that have nucleated on the detachment, represent active  
 213 shortening, or alternatively are responding to a different stress field.

214 Imbricated foredeep and wedge-top basins contain a time-transgressive range of poorly consolidated  
 215 deposits that span the extensional and compressional regimes. Conceivably, shortening fabrics could be recorded in  
 216 lithofacies at the base of one of these basins when it was formed and filled in the shortening part of the wedge, only  
 217 to be superseded by stretching fabrics in overlying lithofacies as the basin was translated westward and into the  
 218 extending part of the wedge. Adriatic slope transverse rivers (Alvarez, 1999) traverse both the extending and  
 219 shortening parts of the wedge and contain Pleistocene alluvial deposits representing an AMS geodetic snapshot of  
 220 the current crustal strains. Published AMS data from the thrust belt shows strike-parallel (NE-SW and horizontal)  
 221 extension that is perpendicular to compression and shortening directions (Caricchi et al., 2016). To confirm these  
 222 data towards the southeast and to better locate the kinematic transition region between the contracting and extending

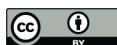

regions of the overlying Eurasian plate, we sampled AMS data in Oligocene and younger units, including Quaternary deposits in a NE-SW oriented corridor across the thrust belt (Fig. 9).

## 5.2 Methods for Example II

Sampling in the Apennines was designed to identify the location of the modern extensional front. Field collection and specimen preparation occurred like sample I from Spain, with unconsolidated samples being hardened with sodium silicate before or just after orienting and removal from the outcrop (Fig. 4). We collected samples from 17 sites from sedimentary rocks and poorly consolidated sediments from Late Eocene to late Pleistocene age, with a focus on late Miocene-Pliocene argillaceous marine deposits (DR Table 1). The Italian specimens were prepared and rock magnetic data was acquired in the Archeomagnetism Laboratory at CENIEH (Spain). The AMS of the collected specimens was measured on a MFK1-FA Kappabridge (AGICO Instruments), a fully automated inductive bridge, at a frequency of 976 Hz and a field of 200 A/m. Analysis software (Saphyr6, by AGICO) creates a complete susceptibility tensor. Rock magnetic measurements included isothermal remanent magnetization (IRM) acquisition experiments up to 1 T and hysteresis curves to determine the relative contribution of ferromagnetism and paramagnetism to the total susceptibility tensor. These experiments were carried out with a Vibrating Sample Magnetometer (VSM; Micromag 3900).

## 5.3 Results of Example II

Samples from the Apennines have variable magnetic mineralogy and include a wider range of lithologies and ages than the Betics sampling. Samples from sites AP2 and AP7 (Bisciaro Fm.) are dominated by diamagnetic calcite and negative mean susceptibility, which precludes any meaningful analysis of the AMS axes orientations. At most other sites, axes orientations were interpretable and the  $k_1$  orientation is shown in Figure 10 for spatial comparison. At 1 T field, the magnetization was not fully-saturated, indicating the presence of hematite in addition to lower coercivity magnetite as the dominant ferromagnetic components (Heller, 1978). Still, the bulk magnetic susceptibility is dominated by paramagnetism as revealed by the hysteresis curves (Fig. 11). The contribution of paramagnetism suggests that the measured magnetic fabric can be used as a proxy for phyllosilicate grain's preferred orientation, therefore, the AMS principal axes are indicators of the orientation of the strain axes orientation (e.g., Soto et al., 2009).

Representative examples of AMS fabrics are shown in Figure 12. The mean susceptibility shows no positive correlation with the shape parameter or anisotropy degree ( $T$ ,  $P_j$ ; Figure 13). Similar to the data from Spain, the AMS ellipsoids from the Italian specimens indicate low  $P_j$  values, revealing a low degree of grain shape preferred orientation and low strains. The AMS axes distribution are particularly clear in specimens of the argillaceous and semi-consolidated Pliocene Argille Azzurre Fm. At all sites,  $k_1$  axes orientations are shown as a function of rock formation, as well as the sites in which  $k_3$  is perpendicular to bedding (Fig. 10). All interpretable specimens from the Apennine Range samples, including the Pleistocene fluvial deposits, generate a site mean AMS fabric consistent with contraction and shortening in the wedge.





## 5.4 Discussion for Example II

Irrespective of sample age, we interpret AMS ellipsoids that have the magnetic lineation in a NW-SE orientation as recording contraction as this is the main trend of the fault traces and strike of bedding and topography (Fig. 10). The  $k_1$  axis orientation is orthogonal to the rock transport and crustal shortening directions as recorded in GPS geodesy data and seismology (Fig. 9). A few sites do not provide interpretable kinematic results. The calcareous marls of the Bisciaro Fm. (AP2, AP7) has a poorly formed AMS fabric. In these specimens, the mean susceptibility is negative and dominated by diamagnetism, most likely calcite. The absence of a compactional fabric in carbonate dominated specimens (AP2, AP7) likely indicates that these sediments lithified by cementation soon after deposition.

In general, the distribution of the principal axes of the AMS ellipsoid does not significantly vary with stratigraphic age or structural position. For example, the oldest specimens collected from Eocene-middle Miocene marls and Pliocene siliciclastics rocks (AP6, AP14, AP17), uniformly show AMS fabrics consistent with contractional deformation of the orogenic wedge (Fig. 10). Most importantly, sites collected from thrust structures that are currently in an extending regime (AP11, AP12, AP13) implies that either the AMS fabrics was locked after the original deformation due to the high strain required to rotate grain pairs, or that subsequent extension has not affected the previous AMS fabric. (e.g., Larrasoña et al., 2004). The same is true for middle and late Miocene siliciclastic deposits astride the Marche ridge (AP3, AP9) where the current orientations of crustal stresses from fault and earthquake data are ambiguous. Pliocene and Pleistocene samples from near the toe of the orogenic wedge show an orientation consistent with ongoing shortening (AP4, AP5, AP8). Wegmann and Pazzaglia (2009) also report ongoing shortening in this region as evidenced by fluvial terrace folding above the Filottrano thrust, which we cross at the location of AP4.

The kinematic transition zone in central Italy aligns with the topography, the seismicity (Pondrelli et al., 2006) and the GPS geodesy (Bennett et al., 2012; Fig. 9). Our AMS data does not improve on the location of the transition zone because of the lack of samples from Plio-Pleistocene deposits directly northeast of the drainage divide (Fig. 10). Unfortunately, the one Pleistocene river terrace deposit northeast of the divide (AP10) has indeterminate axes. As such, our AMS results are not able to support the idea that there is an apparent rotation of the principal compressive stress between the Adriatic coast and the Marche ridge associated with wedge-scale pore-pressure variations (Peacock et al., 2017). Furthermore, the AMS is unable to determine the stress field responsible for the large historic earthquakes in the region between the drainage divide and the Marche Ridge. If earthquakes in the region are related to blind normal faults with tips breaking up-section from the Alto-Tiburina detachment (Fig. 9), a possible rationale is that according to extensional critical wedge theory (Davis et al., 1983), a wedge with a taper greater than some critical value is unable to slide over its basal detachment until sufficient wedge thinning on connecting faults reduces the surface slope and wedge taper below the critical value (Xiao et al., 1991). Suitable deposits do outcrop in this critical region, so additional field work and AMS analyses may yet bear light on this problem.

## 6 Conclusions





297 The AMS technique provides an effective way to identify both modern and paleo-kinematics from  
 298 sediments and sedimentary rocks largely independent of the magnetic mineralogy of a specimen. Stratigraphically  
 299 controlled AMS measurements are a deep-time, paleogeodetic technique that can be combined with structural  
 300 geology, GPS geodesy, and seismic data to collectively describe the kinematics of active orogens and to better  
 301 understand the nature of seismic hazards. In both the Betic Cordillera (Example I) and northern Apennines (Example  
 302 II), weak but well-organized penetrative AMS fabrics were recovered from young unconsolidated and unburied  
 303 rocks that could not be analyzed with more traditional methods. In the Betic Cordillera we established a long-term  
 304 consistency to the strain field from the Late Miocene to the present from unburied, young deposits around Sierra  
 305 Nevada. For the northern Apennines all studied sites, regardless of site's stratigraphic age, ubiquitously record NW-  
 306 SE oriented  $k_1$  axes orientations, irrespective of structural position. Contractional strains in the most southwest-  
 307 located samples are likely locked into the rocks and do not record superposed penetrative extension.  case, the  
 308 recovered magnetic fabric orientation successfully determined the kinematics of an area near the synorogenic  
 309 surface, in the still contracting orogen toe region.

310

### 311 Author Contribution

312 Anastasio, Parés, and Berti conceived  Spanish project and completed sampling, sample preparation,  
 313 measurement, and analyses. Anastasio and Pazzaglia conceived  Italian project. Anastasio, Pazzaglia,  
 314 Montanari, and Karnes completed the Italian sampling. Anastasio and Parés prepared the Italian specimens,  
 315 measured the samples, and analyzed the results. Anastasio, Pazzaglia, Fisher, Berti, and Kodama analyzed results  
 316 and drafted figures for the manuscript. Anastasio and Pazzaglia wrote the first draft of the manuscript and edited  
 317 each subsequent draft. Parés, Kodama, Berti, and Montanari edited multiple drafts of the manuscript. Anastasio  
 318 completed the final edits.

319

### 320 Competing Interests

321 The authors all declare that they have no conflict of interest.

322

### 323 Special Issue Statement

324 This paper is intended for the special issue on “Tools, data and models for 3D seismotectonics: Italy a key  
 325 natural laboratory” Rita De Nardis, Massimiliano Porreca, Ramon Arrowsmith, Luca De Siena, Beatrice Magnani,  
 326 Frank Pazzaglia, and Federico Rossetti, editors.

327

### 328 7 Acknowledgements

329 The authors thank Andrea Rodriguez Rubio, Alondra Jimenez Perez, Isabel Hernando Alonso of CENIEH  
 330 for laboratory assistance and the Association “Le Montagne di San Francesco” for logistical support during the  
 331 sampling campaign in the Umbria-Marche Apennines. Agico is acknowledged for Anisoft software and Lisa Tauxe  
 332 is thanked for PmagPy software  to analyze the AMS data presented here. Anastasio thanks CENIEH and Parés  
 333 for hosting his academic leave during the fall 2019 semester.



334

# 335 **8 References**

- 336 Alvarez, W. Drainage on evolving fold-thrust belts: a study of transverse canyons in the Apennines. *Basin Res*, 11,  
 337 267-284. 1999.
- 338
- 339 Artoni, A.: The Pliocene-Pleistocene stratigraphic and tectonic evolution of the central sector of the Western  
 340 Periadriatic Basin of Italy. *Mar and Petrol Geol*, 42, 82-106. 2013.
- 341
- 342 Averbuch, O., Delamotte, D. F., and Kissel, C.: Magnetic fabric as a structural indicator of the deformation path  
 343 within a fold thrust structure – a test case from the Corbieres (NE Pyrenees, France). *J Struct Geol*, 14, 461-474.  
 344 1992.
- 345
- 346 Azañón, J. M., Galve, J. P., Perez-Pena, J. V., Giaconia, F., Carvajal, R., Booth-Rea, G., Jabaloy, A., Vazquez, M.,  
 347 Azor, A., and Roldan, F. J.: Relief and drainage evolution during the exhumation of the Sierra Nevada (SE Spain): Is  
 348 denudation keeping pace with uplift? *Tectonophysics*, doi:10.1016/j.tecto.2015.06.015. 2015.
- 349
- 350 Bailey, A. W., Burbi, L., Cooper, C., and Ghelardoni, R.: Balanced sections and seismic reflection profiles across  
 351 the central Apennines. *Mem Soc Geol Ital*, 35, 257-310. 1986.
- 352
- 353 Barchi, M., De Feyter, A., Magnani, M., Minelli, G., Piali, G. and Sotera, B.: Extensional tectonics in the Northern  
 354 Apennines (Italy): evidence from the CROP03 deep seismic reflection line. *Mem Soc Geol Ital*, 52, 528–538. 1998.
- 355
- 356 Bartole, R. The north Tyrrhenian-northern Apennines post-collisional system: Constraints for a geodynamic model.  
 357 *Terra Nova*, 7, 7 – 30. 1995.
- 358
- 359 Basili, R. and Barba, S. Migration and shortening rates in the northern Apennines, Italy:  
 360 Implications for seismic hazard. *Terra Nova*, 19, 462 – 468. 2007.
- 361
- 362 Beccaluva, L., G. Gabbianelli, F. Lucchini, P.L. Rossi, and Savelli, C: Petrology and K/Ar Ages of volcanics  
 363 dredged from the Eolian seamounts: Implications for geodynamic evolution of the Southern Tyrrhenian Basin. *Earth*  
 364 *Planet Sc Lett* 74, 187– 208. doi:10.1016/0012-821X(85)90021-4. 1985.
- 365
- 366 Bennett, R. A., Serpelloni, E., Hreinsdottir, S., Brandon, M. T., Buble, G., Basic, T., Casale, G., Cavaliere,  
 367 A., Anzidei, M., Marjonovic, M., Minelli, G., Molli, G., and Montanari, A.: Syn-convergent extension  
 368 observed using the RETREAT GPS network, northern Apennines, Italy. *J Geophys Res*, 117, B04408,  
 369 doi:10.1029/2011JB008744. 2012.

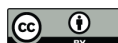

- 370  
 371 Bernini, B.M. The role of transpression movements in the evolution of Neogene basins of the Betic Cordillera. *An*  
 372 *Tect*, 4 ISSN: 0394-5596. 1990.  
 373  
 374 Bice, D., Lacroce, M., McGee, D., and Montanari, A.: Late Pleistocene tectonic tilting of the Frasassi anticline  
 375 from offset stalagmites in the Grotta Grande del Vento (Marche, Italy), in Koeberl, C., and Bice, D.M., eds., 250  
 376 Million Years of Earth History in Central Italy: Celebrating 25 Years of the Geological Observatory of Coldigioco.  
 377 *Geo S Am S* 542, 447–457. [https://doi.org/10.1130/2019.2542\(25\)](https://doi.org/10.1130/2019.2542(25)). 2019.cb  
 378  
 379 Boccaletti, M., Corti, G., and Martelli, L. Recent and active tectonics of the external zone of the Northern  
 380 Apennines (Italy). *Int J of Earth Sci, (Geol Rundsch)*, 100, 1331-1348, DOI: 10.1007/s00531-010-0545-y. 2011.  
 381  
 382 Boncio, P., and Lavecchia, G. Pace, B. Defining a model of 3D seismogenic sources for Seismic Hazard  
 383 Assessment applications: the case of central Apennines (Italy). *J Seismol*, 8, 407–425. 2004.  
 384  
 385 Borradaile, G. J., and Jackson, M.: Anisotropy of magnetic susceptibility (AMS): magnetic petrofabrics of  
 386 deformed rocks, in Martín-Hernández, F. Lüneburg, C.M. Aubourg, and M. Jackson (eds.). *Magnetic Fabric:*  
 387 *Methods and Applications. Geo Soc Spec Publ*, 238, 299-360. London, 0305-8719/04/. 2004.  
 388  
 389 Borradaile, G. J., and Jackson, M.: Structural geology, petrofabrics and magnetic fabrics (AMS, AARM, AIRM). *J*  
 390 *Struct Geol*, 32, 1519–1551. doi: 10.1016/j.jsg.2009.09.006. 2010.  
 391  
 392 Borradaile, G. J., and Henry, B.: Tectonic applications of magnetic susceptibility and its  
 393 anisotropy. *Earth Sci Rev*, 4, 49-93. 1997.  
 394  
 395 Borradaile, G. J., and Tarling, D. H.: The influence of deformation mechanisms on magnetic fabrics in weakly  
 396 deformed rocks. *Tectonophysics*, 77, 151-168. 1981.  
 397  
 398 Burmeister, K. C., Harrison, M. J., Marshak, S., Ferre, E. C., and Bannister, R. A.: 2009. Comparison of Fry strain  
 399 ellipse and AMS ellipsoid trends to tectonic fabric trends in very low-strain sandstone of the Appalachian fold-thrust  
 400 belt. *J Struct Geol*, 9, 1028-1038. 2009.  
 401  
 402 Butler, R. F.: *Paleomagnetism : magnetic domains to geologic terranes*. Blackwell Scientific Publications, Boston.  
 403 1992.  
 404



- 405 Caporali, A., Barba, S., Carafa, M.M.C., Devoti, R., Pietrantonio, G., and Riguzzi, F.: Static stress drop as  
 406 determined from geodetic strain rates and statistical seismicity. *J Geophys Res*, 116, B02410.  
 407 doi:10.1029/2010JB007671. 2011.
- 408
- 409 Caricchi, C., Cifelli, F., Kissel, C., Sagnotti, L., and Mattei, M.: Distinct magnetic fabric in weakly deformed  
 410 sediments from extensional basins and fold-and-thrust structures in the Northern Apennine orogenic belt (Italy):  
 411 *Tectonics*, 35, 238-256, doi:10.1002/2015TC003940. 2016.
- 412
- 413 Carminati, E., and Doglioni, C.: Alps vs. Apennines: The paradigm of a tectonically asymmetric Earth. *Earth Sci*  
 414 *Rev*, 112, 67-96. 2012.
- 415
- 416 Carrigan, J. H., Anastasio, D. J., Berti, C., and Pazzaglia, F. J.: Post-Messinian Drainage  
 417 Reorganization in an Active Orogen, Betic Cordillera, Spain. *Geo Soc Am Abstracts with Programs*. 2018.
- 418
- 419 Cavinato, G.P. and DeCelles, P.: Extensional basins in the tectonically bimodal central Apennines fold-thrust belt,  
 420 Italy. Response to corner flow above a subducting slab in retrograde motion. *Geology*, 27, 955–958. 1999.
- 421
- 422 Chiaraluce, L., Chiarabba, C., Collettini, C., Piccinini, D., and Cocco, M.: Architecture and mechanics of an active  
 423 low-angle normal fault: Alto Tiberina Fault, northern Apennines, Italy. *J Geophys Res*, 112, B10310,  
 424 doi:10.1029/2007JB005015. 1999.
- 425
- 426 Chiaraluce, L., Barchi, M. R., Carannante, S., Collettini, C., Mirabella, F., Pauselli, C., and Valoroso, L. The role of  
 427 rheology, crustal structures and lithology in the seismicity distribution of the northern Apennines. *Tectonophysics*,  
 428 694, 2810-291. 2017.
- 429
- 430 Cloos, E.: Oolite Deformation in South Mountain Fold, Maryland. *Geo Soc Am Bull*, 58, 843-918. 1947.
- 431
- 432 Collettini, C.: The mechanical paradox of low-angle normal faults: Current understanding and open questions.  
 433 *Tectonophysics*, 510, 253-268. 2011.
- 434
- 435 D'Agostino, N., Jackson, J. A., Dramis, F., and Funicello, R.: Interactions between mantle upwelling, drainage  
 436 evolution and active normal faulting: an example from the central Apennines (Italy). *Geophys J Int*, 147, 475-497.  
 437 2001.
- 438
- 439 Davis, D., Suppe, J., and Dahlen, F. A.: Mechanics of fold-and-thrust belts and accretionary  
 440 wedges. *J Geophys Res*, 88 (B2), 1153-1172. 1983.
- 441



- 442 Devoti, R., Riguzzi, F., Cuffaro, M., and Doglioni, C.: New GPS constraints on the kinematics of the Apennines  
 443 subduction. *Earth and Planet Sci Lett*, 273, 163–174. 2008.
- 444
- 445 Doglioni, C., Harabaglia, P., Merlini, S., Mongelli, F., Peccerillo, A.T., and Piromallo, C. 1999. Orogens and slabs  
 446 vs. their direction of subduction. *Earth Sci Rev*, 45, 167–208. 1999.
- 447
- 448 Duggen S., Hoernle, K., van den Bogaard, P., Rüpke, L., & Morgan, J.P.: Deep roots of the Messinian Salinity  
 449 Crisis. *Nature*, 422, 602–606. DOI: 10.1038/nature01553. 2003.
- 450
- 451 Elter, P., Giglia, G., Tongiorgi, M., and Trevisan, L.: Tensional and compressional area in the recent (Tortonian to  
 452 present) evolution of the Northern Apennines. *B Geofis Teor Appl*, 17, 3–18. 1975.
- 453
- 454 Eva, E., Solarino, S., and Boncio, P.: HypoDD relocated seismicity in northern Apennines (Italy) preceding the  
 455 2013 seismic unrest: seismotectonic implications for the Lunigiana-Garfagnana area. *B Geofis Teor Appl*, 55, 739–  
 456 754. 2014.
- 457
- 458 Fernández-Ibáñez, F., and Soto, J.I.: Crustal Rheology and Seismicity in the Gibraltar Arc (western Mediterranean).  
 459 *Tectonics*, 27. doi:10.1029/2007TC002192. 2008.
- 460
- 461 Fernandez-Ibáñez, F., Soto, J. I., Zoback, M. D., and Morales, J.: Present-day stress field in the Gibraltar Arc  
 462 (western Mediterranean). *J Geophy Res: Solid Earth*, 112 (B08404) doi:10.1029/2006JB004683. 2007.
- 463
- 464 Galadini, F. and Galli, P.: Active tectonics in the central Apennines (Italy) - input data for seismic hazard  
 465 assessment. *Nat Hazards*, 22, 225–270. 2000.
- 466
- 467 Ghisetti, F., and Vezzani, L.: Normal faulting, transcrustal permeability and seismogenesis in the Apennines (Italy).  
 468 *Tectonophysics*, 348, 155–168. 2002.
- 469
- 470 Giaconia, F., Booth-Rea, G., Martínez-Martínez, J. M., Azañón, J. M., Storti, F., and Artori, A.: Heterogeneous  
 471 Extension and the Role of Transfer Faults in the Development of the Southeastern Betic Basins (SE Spain).  
 472 *Tectonics*, 33, 2467–89. doi:10.1002/2014TC003681. 2014.
- 473
- 474 Giaconia, F., Booth-Rea, G., Ranero, C.R., Gràcia, E., Bartolome, R., Calahorrano, A., Lo Iacono, C., Vendrell,  
 475 M.G., and Cameselle, A.L.: Compressional tectonic inversion of the Algero-Balearic basin: Latest Miocene to  
 476 present oblique convergence at the Palomares margin (Western Mediterranean). *Tectonics*, 34, 1516–1543.  
 477 <https://doi.org/10.1002/2015TC003861>. 2015.
- 478



- 479 Gutscher, M.A., Dominguez, S., Westbrook, G.K., Le Roy, P., Rosas, F., Duarte, J. C., Terrinha, P., Miranda, J.M.,  
 480 Graindorge, D., Gailler, A., Sallares, V., and Bartolome, R.: The Gibraltar  
 481 Subduction: A Decade of New Geophysical Data. *Tectonophysics*, 574-575, 72–91.  
 482 doi:10.1016/j.tecto.2012.08.038. 2012.  
 483  
 484 Heller, F.: Rockmagnetic studies of Upper Jurassic limestones from southern Germany. *J Geophys*, 44, 525-543.  
 485 1978.  
 486  
 487 Henry B.: The magnetic zone axis: a new element of magnetic fabric for the interpretation of magnetic lineation.  
 488 *Tectonophysics*, 271, 325–331. 1997.  
 489  
 490 Hill, K. and Hayward, A.: Structural constraints on the Tertiary plate tectonic evolution of Italy. *Mar Petrol Geol*, 5,  
 491 2 – 16. 1988.  
 492  
 493 Hreinsdóttir, S., and Bennett, R.A.: Active aseismic creep on the Alto Tiberina low-angle normal fault, Italy.  
 494 *Geology* 37, 683–686. <https://doi.org/10.1130/G30194A.1>. 2009  
 495  
 496 Hrouda, F.: Magnetic Anisotropy of Rocks and Its Application in Geology and Geophysics.  
 497 *Geophysical Surveys*, 5, 37-82. <http://dx.doi.org/10.1007/BF01450244>. 1982.  
 498  
 499 Jelinek, V.: Characterization of the magnetic fabric of rocks. *Tectonophysics*, 79, 63-67. 1981.  
 500  
 501 Kligfield, R., Owens, W. H., and Lowrie, W.: Magnetic susceptibility anisotropy, strain and progressive deformation  
 502 in Permian sediments from the Maritime Alps (France). *Earth Planet Sc Lett*, 55, 181–189. doi: 10.1016/0012-  
 503 821X(81)90097-2. 1981.  
 504  
 505 Kodama, K. P. and Sun, W-W.: Magnetic anisotropy as a correction for compaction-caused  
 506 paleomagnetic inclination shallowing. *Geophys J Int*, 111, 465-469. 1992.  
 507  
 508 Koulali, A., Ouazar, D., Tahayt, A. King, R. W., Vernant, P., Reilinger, R. E., McClusky, S.,  
 509 Mourabit, T., Davila, J. M., and Amraoui, N.: New GPS constraints on active deformation along the Africa-Iberia  
 510 plate boundary: *Earth Planet Sc Lett*, 308, 211-217. 2011.  
 511  
 512 Larrasoña, J.C., Pueyo, E.L., and Parés, J.M.: An integrated AMS, structural, paleo- and rock-magnetic study of the  
 513 Eocene marine marls from the Jaca-Pamplona basin (Pyrenees, N Spain); new insights into the timing of magnetic  
 514 fabric acquisition in weakly deformed mudrocks. *Magnetic Fabric: Methods and Applications* (Martín-Hernández,  
 515 F., Lüneburg, C.M., Aubourg, C. y Jackson, M. Eds.). *Geol Soc Sp Publ*, London, 238, 127-143. 2004.



- 516  
 517 Latta, D.K. and Anastasio, D.J.: Multiple scales of mechanical stratification and décollement fold kinematics, Sierra  
 518 Madre Oriental foreland, northeast Mexico. *Jof Struct Geol*, 29, 1241-1255. 2007.  
 519  
 520 Lavecchia, G., Adinolfi, G. M., Nardis, R., Ferrarini, F., Cirillo, D., Brozzetti, F., De Matteis, R., Festa, G., and  
 521 Zollo, A.: Multidisciplinary inferences on a newly recognized active east dipping extensional system in Central  
 522 Italy. *Terra Nova*, 29, 77-89. 2016.  
 523  
 524 Lavecchia, G., Brozzetti, F., Barchi, M., Menichetti, M., and Keller, J.V.: Seismotectonic zoning in east-central  
 525 Italy deduced from an analysis of the Neogene to present deformations and related stress fields. *Geol Soc Am Bull*,  
 526 106, 1107–1120. 1994.  
 527  
 528 Le Pichon, X., G. Pautot, J. M. Auzende, and Olivet, J. L.: La Mediterranee occidentale depuis l'oligocene; scheme  
 529 d'évolution: The western Mediterranean since the Oligocene; evolutionary scheme, *Earth Planet Sc Lett*, 13, 145 –  
 530 152. 1971.  
 531  
 532 Le Pichon, X. and Angelier, J.: The Hellenic arc and trench system: a key to the neotectonic  
 533 evolution of the eastern Mediterranean area. *Tectonophysics*, 60, 1-42. 1979.  
 534  
 535 Lonergan, L.: Timing and kinematics of deformation in the Malaguide Complex, internal zone of the Betic  
 536 Cordillera, southeast Spain. *Tectonics*, 12, 460–476 <https://doi.org/10.1029/92TC02507>. 1993.  
 537  
 538 Lonergan, L., and White, N.: Origin of the Betic-Rif Mountain Belt. *Tectonics*, 16, 504–22.  
 539 doi:10.1029/96TC03937. 1997.  
 540  
 541 Makris, J., Egloff, F., Nicolich, R., and Rihm, R.: Crustal structure from the Ligurian Sea to the Northern  
 542 Apennines-a wide angle seismic transect. *Tectonophysics*, 301, 305 – 319. 1999.  
 543  
 544 Mancilla, FdL., Stich, D., Berrocoso, M., Martin, R., Morales, J., Fernandez-Ros, A., Paez, R.,  
 545 and Perez-Pena, A.: Delamination in the Betic Range: Deep structure, seismicity, and GPS motion. *Geology*, 41,  
 546 307-310. 2013.  
 547  
 548 Martin-Hernandez, F. and Hirt, A.M.: The anisotropy of magnetic susceptibility in biotite,  
 549 muscovite and chlorite single crystals. *Tectonophysics*, 367, 13-28. 2003.  
 550  
 551 Martín-Hernández, F. and Ferré, E.C.: Separation of paramagnetic and ferrimagnetic anisotropies. A review. *J*  
 552 *Geophys Res: Sol Ea* 112 (B3), <https://doi.org/10.1029/2006JB004340>. 2007.





- 553
- 554 Martínez-Martínez, J. M., Booth-Rea, G., Azañón, J. M., and Torcal, F.: Active transfer fault  
 555 zone linking a segmented extensional system (Betics, Southern Spain): Insight into heterogeneous extension Driven  
 556 by Edge Delamination. *Tectonophysics*, 422, 159–73.  
 557 doi:10.1016/j.tecto.2006.06.001. 2006.
- 558
- 559 Martínez-Martínez, J. M. and Soto, J. I.: Orthogonal folding of extensional detachments: Structure and origin of the  
 560 Sierra Nevada elongated dome (Betics, SE Spain). *Tectonics*, 21, doi:  
 561 10.1029/2001TC001283. 2002.
- 562
- 563 Mattei, M., Sagnotti, L., Faccenna, C., and Funiciello, R.: Magnetic fabric of weakly deformed clay-rich sediments  
 564 in the Italian peninsula: Relationship with compressional and extensional tectonics. *Tectonophysics*, 271, 107–122.  
 565 1997.
- 566
- 567 Mazzoli, S. and Helman, M.: Neogene patterns of relative plate motion for Africa-Europe:  
 568 some implications for recent central Mediterranean tectonics. *Geol Rund*, 83, 464–68. 1994.
- 569
- 570 Milia, A., Turco, E., Pierantoni, P. P., and Schettino, A.: Four-dimensional tectono- stratigraphic evolution of the  
 571 southeastern Peri-Tyrrhenian Basins (Margin of Calabria, Italy). *Tectonophysics*, 476, 41–56,  
 572 doi:http://dx.doi.org/10.1016/j.tecto.2009.02.030. 2009.
- 573
- 574 Mitra, G., and Sussman, A.J.: Structural evolution of connecting splay duplexes and their  
 575 implications for critical taper; an example based on geometry and kinematics of the Canyon Range culmination,  
 576 Sevier Belt, central Utah. *J Struct Geol*, 19, 503–521. 1997.
- 577
- 578 Papazachos, B. C., Karakostas, V. G., Papazachos, C. B., and Scordilis, E. M.: The geometry of the Wadati-Benioff  
 579 zone and lithospheric kinematics in the Hellenic arc. *Tectonophysics*, 319, 275–300. 2000.
- 580
- 581 Parés, J. M., Hassold, N. J. C., Rea, D. K., and van der Pluijm, B. A.: Paleocurrent directions from paleomagnetic  
 582 reorientation of magnetic fabrics in deep-sea sediments at the Antarctic Peninsula Pacific margin (ODP Sites 1095,  
 583 1101). *Mar Geol*, 242, 4, 261–269. 2007.
- 584
- 585 Parés, J. M. and van der Pluijm, B. A.: Evaluating magnetic lineations (AMS) in deformed rocks. *Tectonophysics*,  
 586 350, 283–298. 2002.
- 587
- 588 Parés, J.M.: How deformed are weakly deformed mudrocks? Insights from magnetic anisotropy. *Geol Soc Sp*, 238,  
 589 191–203. 2004.



- 590  
 591 Parés, J.M. and van der Pluijm, B.: Phyllosilicate fabric characterization by low temperature  
 592 anisotropy of magnetic susceptibility (LT-AMS). *Geophys Res Lett*, 29, 68-1-68-4. 2003.  
 593  
 594 Peacock, C. P., Tavernelli, E., and Anderson, M. W.: Interplay between stress permutations and overpressure to  
 595 cause strike-slip faulting during tectonic inversion. *Terra Nova*, 29, 61-70,  
 596 doi:10.1111/ter.12249. 2017.  
 597  
 598 Peters, C. and Dekkers, M. J.: Selected room temperature magnetic parameters as a function of mineralogy,  
 599 concentration and grain size. *Phys Chem Earth*, 28, 659-667. 2003.  
 600  
 601 Piali, G., Barchi, M., and Minelli, G., (eds.): Results of the CROP 03 deep seismic reflection profile. *Mem Soc*  
 602 *Geol Ital*, 52, 647 pp. 1998.  
 603  
 604 Picotti, V. and Pazzaglia, F. J.: A new active tectonic model for the construction of the Northern Apennines  
 605 mountain front near Bologna (Italy). *J Geophys Res*, 113, B08412, doi: 10.1029/2007JB005307. 2008.  
 606  
 607 Platt J. P., Anczkiewicz R., Soto J. I., and Kelley S. P., Thirlwall, M.: Early Miocene continental subduction and  
 608 rapid exhumation in the western Mediterranean. *Geology*, 34, 981-984. 2006.  
 609  
 610 Platt, J. P., Behr, W. M., Johannesen, K., and Williams, J.R.: The Betic-Rif Arc and its orogenic hinterland: a review.  
 611 *Annu Rev Earth and Pl Sc*, 41, 313–357.  
 612 doi:10.1146/annurev-earth-050212-123951. 2013.  
 613  
 614 Pondrelli, S., Salimbeni, S., Ekstrom, G., Morelli, A., Gasperini, P. and Vannucci, G.: The Italian CMT dataset  
 615 from 1977 to the present. *Phys Earth Planet Int*, 159, 286–303, doi:10.1016/j.pepi.2006.07.008. 2006.  
 616  
 617 Porreca, M. and Mattei, M.: AMS fabric and tectonic evolution of Quaternary intramontane extensional basins in the  
 618 Picentini Mountains (southern Apennines, Italy): *Int J Earth Sci*, 101, 863-877. 2012.  
 619  
 620 Ramsay, J. G. and Huber, M. I.: *The Techniques of Modern Structural Geology*, Vol. 1. Academic Press, San  
 621 Diego. 1984.  
 622  
 623 Richter, C., van der Pluijm, B., and Housen, B.: The quantification of crystallographic preferred orientation using  
 624 magnetic anisotropy. *J Struct Geol*, 15, 113–116. 1993.  
 625



- 626 Roberts, G.P. and Michetti, A.M.: Spatial and temporal variations in growth rates along active normal fault systems:  
 627 an example from the Lazio-Abruzzo Apennines, central Italy. *J Struct Geol*, 26, 339–376. 2004.  
 628
- 629 Rosenbaum, G., Lister, G. S., and Duboz, C.: Reconstruction of the Tectonic Evolution of the Western  
 630 Mediterranean since the Oligocene. *Tectonophysics*, 359, 117–129. 2002.  
 631
- 632 Rovida, A., Locati, M., and Camassi, R.: The Italian earthquake catalogue CPTI15. *B Earthq Eng*, 18, 2953–2984.  
 633 2020.  
 634
- 635 Sagnotti, L., Speranza, F., Winkler, A., Mattei., and Funicello, R.: Magnetic fabric of clay sediments from the  
 636 external northern Apennines (Italy). *Phys Earth Planet Int*, 105, 73–93. 1998.  
 637
- 638 Sanz De Galdeano, C.: Geologic evolution of the Betic Cordilleras in the Western Mediterranean, Miocene to the  
 639 present. *Tectonophysics*, 172, 107–119. [https://doi.org/10.1016/0040-1951\(90\)90062-D](https://doi.org/10.1016/0040-1951(90)90062-D). 1990.  
 640
- 641 Sanz De Galdeano, C. and Vera, J. A.: Stratigraphic record and palaeogeographical context of the Neogene basins in  
 642 the Betic Cordillera, Spain. *Basin Res*, 4, 21–36. 1992.  
 643
- 644 Schwehr, K., Tauxe, L., Driscoll, N., and Lee, H.: Detecting compaction disequilibrium with anisotropy of magnetic  
 645 susceptibility. *Geochem, Geophy, Geosy*, 7, Q11002. doi: 10.1029/2006GC001378. 2006.  
 646
- 647 Soto, J.I., Fernandez-Ibanez, F., Fernandez, M., and Garcia-Casco, A.: Thermal structure of the crust in the  
 648 Gilbralter Arc: Influence on active tectonics in the western Mediterranean. *Geochem, GeophyGeosy*, 9,  
 649 <http://dx.doi.org/10.1029/2008GC002061>. 2008.  
 650
- 651 Soto, R., Larrasoña, J.C., Arlegui, L.E., Beamud, E., Oliva-Urcia, B., and Simón, J.L.: Reliability of magnetic  
 652 fabrics of weakly deformed mudrocks as a palaeostress indicator in compressive settings. *J Struct Geol*, 31, 512 -  
 653 522. 2009.  
 654
- 655 Stich, D., Serpelloni, E., Mancilla, F. d. L., and Morales, J.: Kinematics of the Iberia– Maghreb plate contact from  
 656 seismic moment tensors and GPS observations. *Tectonophysics*, 426, 295–317, doi:10.1016/j.tecto.2006.08.004.  
 657 2006.  
 658
- 659 Tarling, D.H. and Hrouda, F.: *The Magnetic Anisotropy of Rocks*. Chapman and Hall, London, UK. 1993.  
 660
- 661 Tauxe, L.: *Paleomagnetic Principles and Practices*. Kluwer Academic Publishers. Norwell,  
 662 MA. 2002.



663

664 Tarquini S., Vinci S., Favalli M., Doumaz F., Fornaciai A., Nannipieri L.: Release of a 10-m-resolution DEM for  
 665 the Italian territory: Comparison with global-coverage DEMs and anaglyph-mode exploration via the web,  
 666 Computers & Geosciences, 38, 168-170. doi: doi:10.1016/j.cageo.2011.04.018. 2012.

667

668 Wegmar  W. and Pazzaglia, F. J.: Late Quaternary fluvial terraces of the Romagna and  
 669 Marche Apennines, Italy: Climatic, lithologic, and tectonic controls on terrace genesis in an active orogen.  
 670 Quaternary Sci Rev, 28, 137-165. 2009.

671

672 Valoroso, L., Chiaraluce, L., Di Stefano, R., and Monachesi, G.: Mixed-mode slip behavior of the Alto Tiberina  
 673 low-angle normal fault system (Northern Apennines, Italy) through high-resolution earthquake locations and  
 674 repeating events. J Geophys Res: Sol  
 675 Ea, 122, 10,220-10,240. 2017.

676

677 Xiao, H-B., Dahlen, F. A., and Suppe, J.: Mechanics of extensional wedges. J Geophys Res, 96, 10,301-10,318.  
 678 1991.

679

## 680 Figure Captions

681

682 Figure 1. Topography and bathymetry of the western Mediterranean showing (a) the Betic orogen, southern Spain  
 683 and (b) the northern Apennine Mountains, Italy. Elevation data from GEBCO 30sec data.

684 [https://www.gebco.net/data\\_and\\_products/gridded\\_bathymetry\\_data/](https://www.gebco.net/data_and_products/gridded_bathymetry_data/)

685

686 Figure 2. Geodetic, paleogeodetic, and earthquake focal mechanism data from southern Spain. Generalized geology  
 687 (from Azañón et al., 2015), focal mechanism solutions for normal faults (from Mancilla et al., 2013), mineral  
 688 lineations [short red lines] (from Martínez-Martínez and Soto, 2002), results from 10-years of observed velocity  
 689 GPS permanent [black arrows, with uncertainties] (from Gutscher et al., 2012), and campaign [yellow arrows and  
 690 uncertainties] (from Koulali et al., 2011), stations in an African (Nubia) fixed reference frame. SN = Sierra Nevada.

691 Bathymetry color depths as in Fig. 1. Elevation data from 30 m SRTM NASA JPL. NASA Shuttle Radar

692 Topography Mission Combined Image Data Set. 2014, distributed by NASA EOSDIS Land Processes DAAC,

693 <https://doi.org/10.5067/MEaSUREs/SRTM/SRTMIMG003>.

694

695

696 Figure 3. Simplified geologic map showing sample sites around the Sierra Nevada massif, southern Spain. Lower  
 697 hemisphere stereographic projection of AMS determined principal axes, k<sub>1</sub>-red squares, k<sub>2</sub>, green triangles, k<sub>3</sub>, blue  
 698 circles. Bedding orientation shown along with axes orientation uncertainties. Elevation data from 30 m SRTM



699 NASA JPL. NASA Shuttle Radar Topography Mission Combined Image Data Set. 2014, distributed by NASA  
 700 EOSDIS Land Processes DAAC, <https://doi.org/10.5067/MEaSUREs/SRTM/SRTMIMG003>.

701  
 702 Figure 4.

703 Examples of specimen collection from poorly cemented samples. (a) a sampling surface is carved in a massive  
 704 sandstone of the upper Miocene Laga Fm., northern Apennines (b) the same is done on a subhorizontal layer of a  
 705 poorly cemented, fine calcareous sandstone from an upper Middle Pleistocene fluvial terrace exposed in a wine  
 706 cellar at the Geological Observatory of Coldigioco, northern Apennines. Both samples were hardened with a dilute  
 707 sodium silicate solution. Three to four oriented blocks were collected from each sampling site. Samples were  
 708 oriented with a Brunton compass and located with a handheld GPS receiver, labeled, and photographed.

709  
 710 Figure 5. Magnetic mineralogy of Sierra Nevada specimens. (top) Low temperature (MS vs T)  
 711 measured on a KLY-3s Kappabridge. Data in red and paramagnetic modeling in green indicating the proportion of  
 712 the magnetic susceptibility carried by paramagnetic grains. Results from all measurements indicate that the magnetic  
 713 susceptibility of the Spanish samples varies from being dominated by paramagnetic to ferromagnetic mineral grains.  
 714 The kinematic interpretation is the same in all cases. (bottom) High temperature (MS vs T) measurements showing  
 715 heating from room temperature (20°C) to 700°C and subsequent cooling back to room temperature. All sites  
 716 show evidence of the ferromagnetic mineral magnetite (Curie Temperature of 580°C). A lower temperature phase is  
 717 indicated in site 5, possibly maghemite. Site 5 shows the formation of additional magnetite during heating because  
 718 of the much stronger susceptibility upon cooling. Heating curves are in red and cooling curves in blue.

719  
 720 Figure 6. (a) Plot of mean susceptibility ( $K_m$ ) with respect to ellipsoid shape, (T). Oblate shapes are positive T  
 721 whereas prolate shapes are negative T. The specimens are color coded by site and consistent with Fig. 3. The lack  
 722 of correlation between ellipsoid shape and susceptibility strengthens the conclusions based on site comparisons we  
 723 present here. (b) Jelinek diagram of Sierra Nevada specimens colored by site and consistent with Fig. 3. All AMS  
 724 measurements have low anisotropy (less than 12%  $P_j$ ) and nearly all specimens are oblate ( $T > 0$ ). T and  $P_j$  are  
 725 calculated as follows: if  $n_1 = \ln(t_1)$ ,  $n_2 = \ln(t_2)$ ,  $n_3 = \ln(t_3)$ , where  $t_1$ ,  $t_2$ , and  $t_3$  are the eigenvalues, then  $T = (2n_2 - n_1 -$   
 726  $n_3) / (n_1 - n_3)$  and  $P = \exp(\sqrt{2[(n_1 - n_{\text{mean}})^2 + (n_2 - n_{\text{mean}})^2 + (n_3 - n_{\text{mean}})^2]})$  and  $n_{\text{mean}} = (n_1 + n_2 + n_3) / 3$

727  
 728 Figure 7. All Sierra Nevada massif AMS data. Lower hemisphere, stereographic projection of the principal axes of  
 729 susceptibility orientations for all specimens determined from AMS measurements in stratigraphic coordinates (Fig.  
 730 3). Arrows outside the stereonet periphery are parallel to the mean long axis ( $k_1$ ) orientation.  $k_1$  = Maximum axis,  
 731  $k_2$  = intermediate axis,  $k_3$  = minimum axis.

732  
 733 Figure 8. Kinematic summary of AMS Example I. Comparison of paleogeodetic methods around the Sierra Nevada  
 734 massif, Spain illustrating the validity of AMS determined principal extension direction ( $k_1$ ).

735



Figure 9. (a) Location map showing the topography, major known faults, large, historic earthquakes (from Boncio et al., 1998) and GPS geodetic velocities (from Hreinsdottir and Bennett, 2009) in the northern Apennine research corridor (gray shaded box). Elevation data from TINITALY 10 m DEM (Tarquini et al., 2012). Alto Tiberina Fault (ATF), Ancona (A), Apiro (Ap), Arezzo (Ar), Ascoli Piceno (AP), Cagli (C), Camerino (Cm), Cascia (Ca), Fabriano (F), Foligno (Fo), Gola di Frasassi (GdiF), Gubbio (G), Jesi (J), Macerata (M), Norcia (N), Osservatorio Geologico Coldigioco (OGC), Perugia (P), Spoleto (S), Visso (V). (b) Inset regional map showing the plate boundary and location of Fig 9a. (c) Synthetic cross section of the region in (a) projected to the X-X' line (modified from Chiaraluce et al., 2017). Normal faults in black, thrust faults in red, top of Permo-Triassic evaporites in blue, top of carbonates in green. (d) Photo of a commonly exposed bedrock fault scarp from the Umbrian Apennines. Fault scarps are uncommon in most of Marche.

Figure 10. Results of AMS analysis in the northern Apennines over 1:10,000 simplified geology (from regione Marche and Umbria, regione.marche.it; <http://dati.umbria.it/>) and topography. Elevation data from 30 m NASA JPL. NASA Shuttle Radar Topography Mission Combined Image Data Set. 2014, distributed by NASA EOSDIS Land Processes DAAC, <https://doi.org/10.5067/MEaSURES/SRTM/SRTMIMG003>. Extensional earthquake data compiled from Rovida et al. (2020). The presence of a tectonic fabric was determined by clustering of  $k_1$  declinations outside of the expected compaction fabric. Axis certainty represents the percentage of specimens of the total used to calculate a mean  $k_1$  vector. Right Legend: 1. Holocene fill; 2. 1st order Quaternary Terrace (Qt1); 3. 2nd order Quaternary Terrace (Qt2); 4 3rd order Quaternary Terrace (Qt3); 5. Argille Azzurre Fm; 6. Scaglia Rossa Fm; 7. Maiolica Fm; 8. Bisciaro Fm; 9. Hypothesized position of the modern extensional front based on AMS results; 10. Thrust fault; 11. Normal fault; 12. Alto-Tiberina detachment. ; 13. Drainage divide; 14. Large historic, but pre-instrument earthquakes of unknown origin (see Fig. 9).

Figure 11. (a) Hysteresis curves for representative samples of the studied Apennine Range geologic formations (see location in Fig. 10). Paramagnetic susceptibility clearly dominates all the specimens as revealed by the slope of the loops. (b) Example of a specimen where the paramagnetic contribution has been removed in order to enhance the ferromagnetic contribution (loop in black). (c) Example of a specimen where diamagnetism dominates the total magnetic susceptibility.

Figure 12. Lower hemisphere stereographic projection of representative sites showing representative fabric patterns in Quaternary deposits (a) and older rocks in the Apennine foreland (b), (c), and older rocks south of extensional front (d). The orientation of bedding is shown when not horizontal.

Figure 13. (a) Plot of mean susceptibility ( $K_m$ ) with respect to degree of anisotropy, ( $P_j$ ) for the Apennine specimens. The specimens are color coded by site. (b) Jelinek diagram of Apennine specimens, colored by site. All AMS measurements consistent with low strains ( $P_j$ , degree of anisotropy) and nearly all specimens are oblate ( $T > 0$ ). T



772 and  $P_j$  are calculated as follow  $n_1 = \ln(t_1)$ ,  $n_2 = \ln(t_2)$ ,  $n_3 = \ln(t_3)$ , where  $t_1$ ,  $t_2$ , and  $t_3$  are the eigenvalues, then  
 773  $T = (2n_2 - n_1 - n_3) / (n_1 - n_3)$  and  $P = \exp(\sqrt{2[(n_1 - n_{\text{mean}})^2 + (n_2 - n_{\text{mean}})^2 + (n_3 - n_{\text{mean}})^2]})$  and  $n_{\text{mean}} = (n_1 + n_2 + n_3) / 3$ .  
 774





Table A1.

| Sample       | Lat      | Long     | Elevation (m) | Formation             | Age                | Composition and Texture                              |
|--------------|----------|----------|---------------|-----------------------|--------------------|------------------------------------------------------|
| <b>Spain</b> |          |          |               |                       |                    |                                                      |
| SN1          | 37.04972 | -3.64923 | 853           | -                     | Quaternary         | Siliciclastic silt                                   |
| SN3          | 36.9539  | -3.05758 | 555           | -                     | Quaternary         | Siliciclastic silt                                   |
| SN4          | 36.95832 | -2.99537 | 600           | -                     | Neogene            | Siliciclastic silt                                   |
| SN5          | 37.26138 | -3.73503 | 609           | -                     | Neogene            | Siliciclastic silt                                   |
| SN6          | 37.00809 | -2.56091 | 501           | -                     | Neogene            | Siliciclastic sand                                   |
| SN7          | 37.22960 | -3.11414 | 1037          | -                     | Neogene            | Siliciclastic sand                                   |
| <b>Italy</b> |          |          |               |                       |                    |                                                      |
| AP1          | 43.34778 | 13.12132 | 462           | Ghiaia Urbisaglia Fm  | Early Pleistocene  | Calcareous and siliciclastic silt                    |
| AP2          | 43.36193 | 13.09481 | 454           | Bisciaro Fm           | Early Miocene      | Argillaceous marl                                    |
| AP3          | 43.35226 | 13.11542 | 502           | Laga Fm               | Late Miocene       | Argillaceous silty sand                              |
| AP4          | 43.42590 | 13.23293 | 217           | Qt4 alluvium          | Late Pleistocene   | Calcareous and siliciclastic silt                    |
| AP5          | 43.46141 | 13.30483 | 126           | Argille Azzurre Fm    | Pliocene           | Siliciclastic blue-gray silty clay                   |
| AP6          | 43.53607 | 13.59282 | 218           | Scaglia Variegata Fm  | Late Eocene        | Argillaceous marl                                    |
| AP7          | 43.55456 | 13.57438 | 215           | Bisciaro Fm           | Early Miocene      | Argillaceous marl                                    |
| AP8          | 43.40956 | 13.10795 | 425           | Argille Azzurre Fm    | Pliocene           | Siliciclastic blue-gray silty clay                   |
| AP9          | 43.30225 | 13.02115 | 469           | Fm Camerino (Laga Fm) | Late Miocene       | Siliciclastic argillaceous sandy silt                |
| AP10         | 43.40180 | 12.96773 | 223           | Qt3 alluvium          | Middle Pleistocene | Calcareous and siliciclastic silt                    |
| AP11         | 43.41049 | 12.58075 | 553           | Marnosa Arenacea Fm   | Middle Miocene     | Siliciclastic argillaceous sandy silt                |
| AP12         | 43.38627 | 12.56814 | 638           | Marnosa Arenacea Fm   | Middle Miocene     | Siliciclastic argillaceous sandy silt                |
| AP13         | 43.38261 | 12.56343 | 629           | Bisciaro Fm           | Early Miocene      | Argillaceous marl                                    |
| AP14         | 43.20721 | 13.00143 | 520           | Scaglia Cinerea Fm    | Oligocene          | Siliciclastic and calcareous argillaceous sandy silt |
| AP15         | 43.24922 | 12.97616 | 406           | Scaglia Cinerea Fm    | Oligocene          | Siliciclastic and calcareous argillaceous sandy silt |
| AP16         | 43.51872 | 12.72748 | 500           | Scaglia Cinerea Fm    | Oligocene          | Siliciclastic and calcareous argillaceous sandy silt |
| AP17         | 43.56574 | 12.80247 | 421           | Laga Fm               | Late Miocene       | Siliciclastic argillaceous sandy silt                |

775  
 776  
 777



778

779

Figure 1

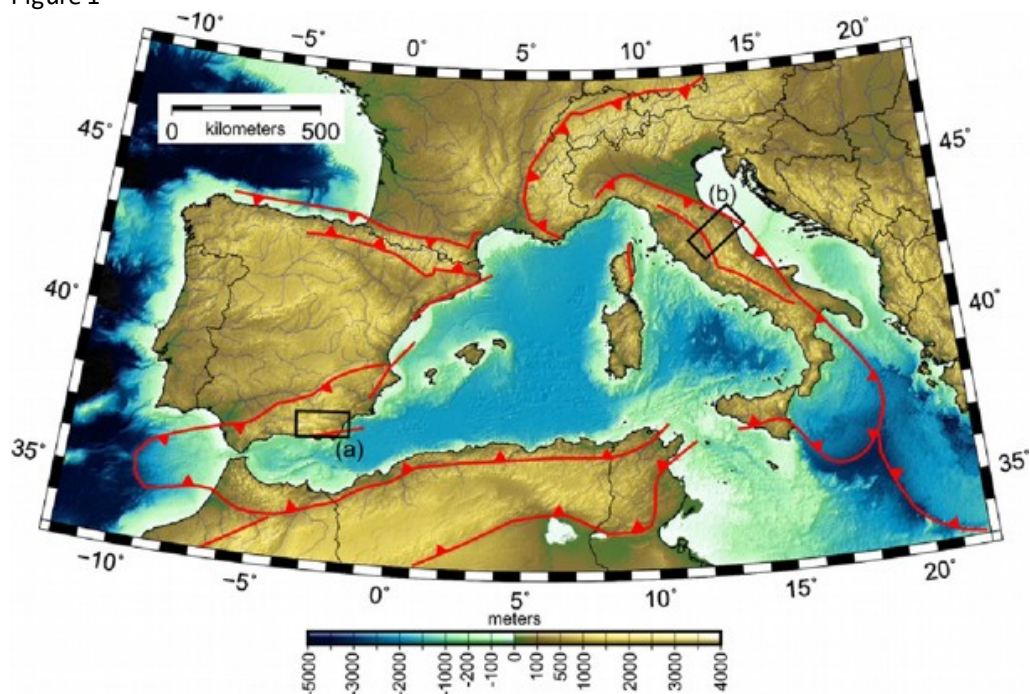

780  
781



Figure 2

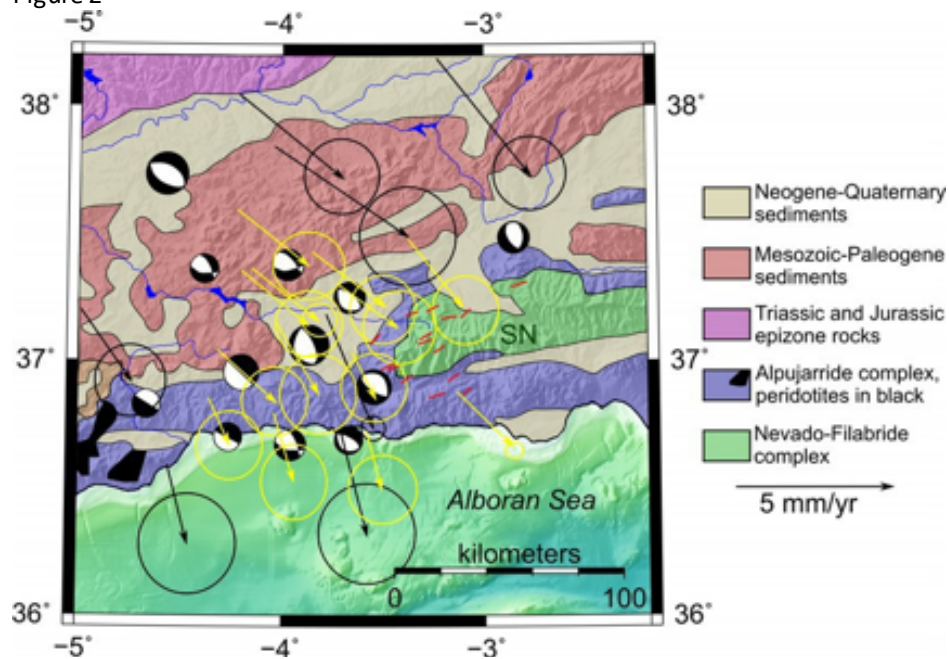

782  
 783

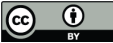

784 Figure 3

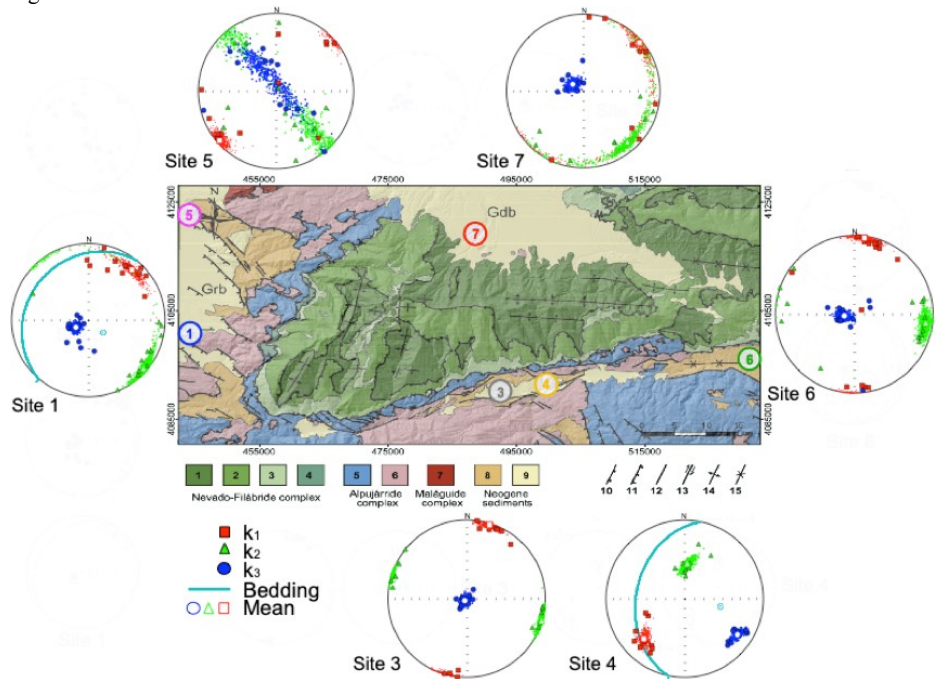

785  
786  
787  
788  
789  
790  
791  
792  
793



Figure 4

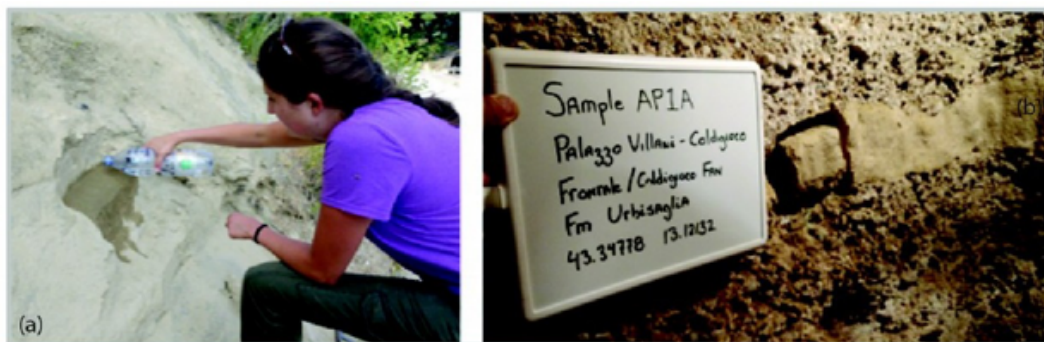

794  
795  
796  
797



Figure 5

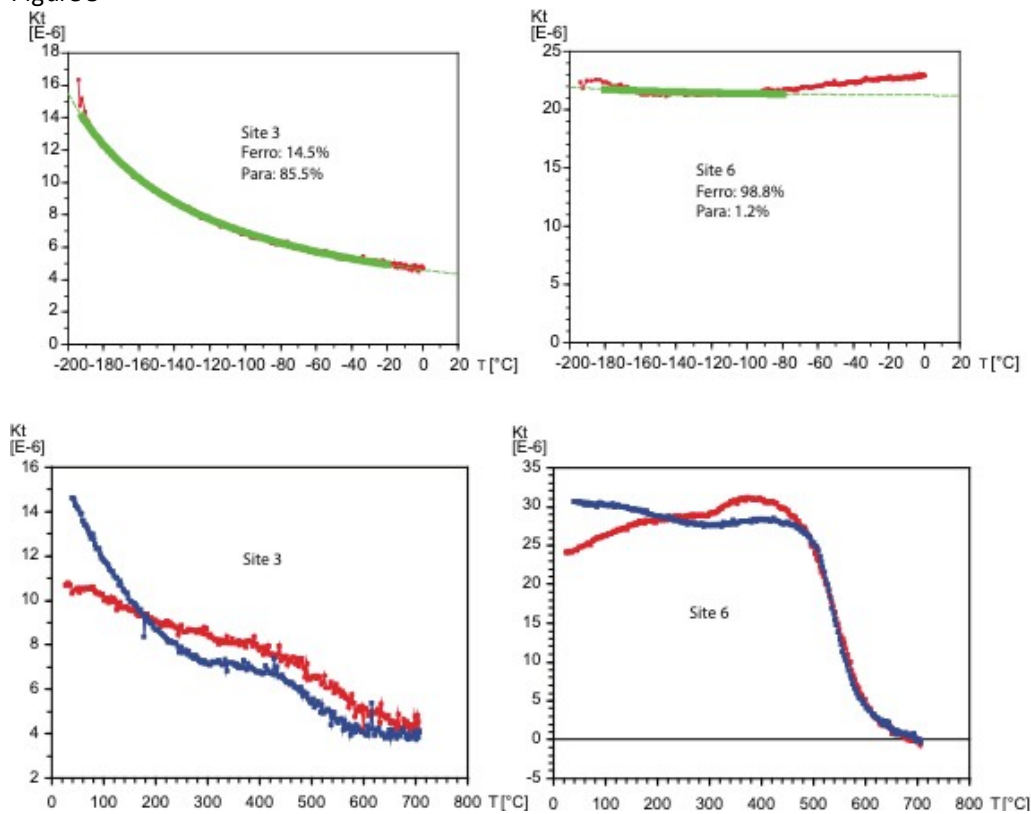

798  
 799  
 800



Figure 6

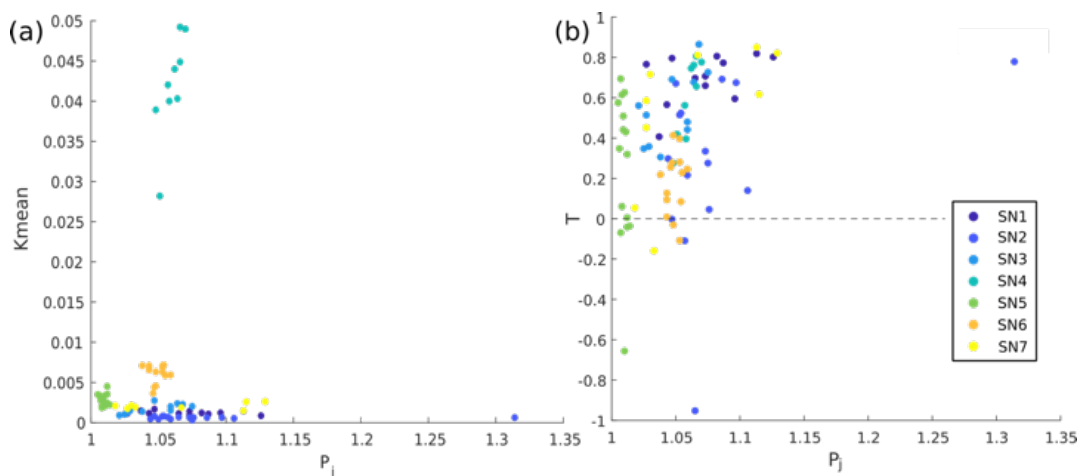

801  
 802  
 803  
 804





Figure 7

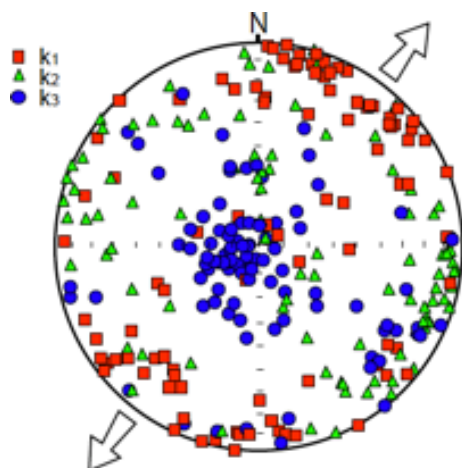

805  
 806  
 807  
 808



Figure 8

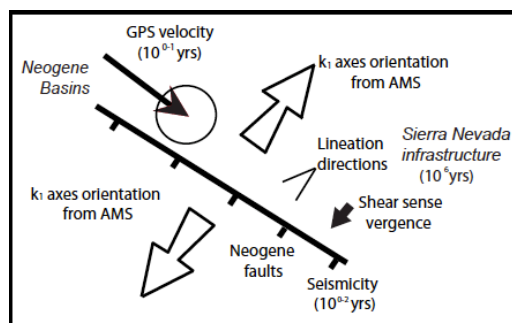

809  
 810  
 811  
 812  
 813  
 814  
 815  
 816



Figure 9

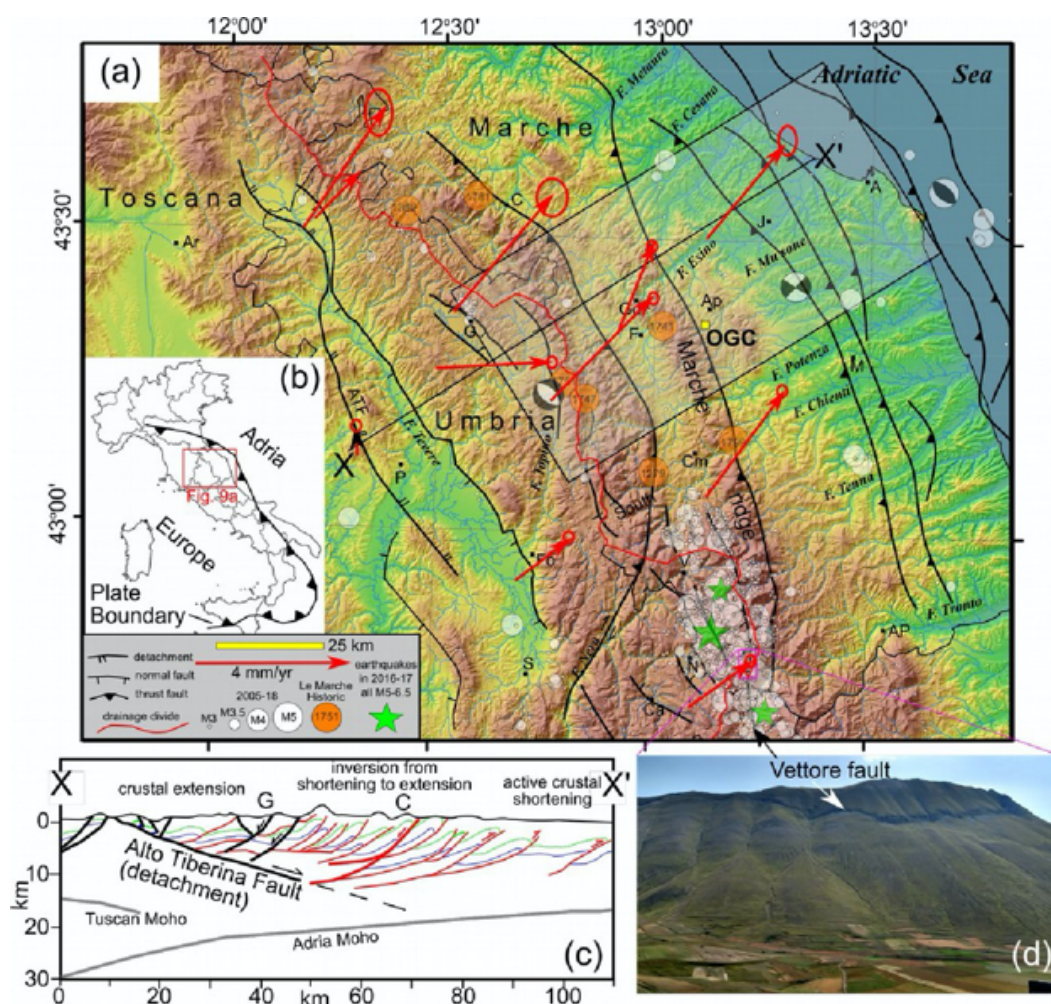

817  
 818  
 819



Figure 10

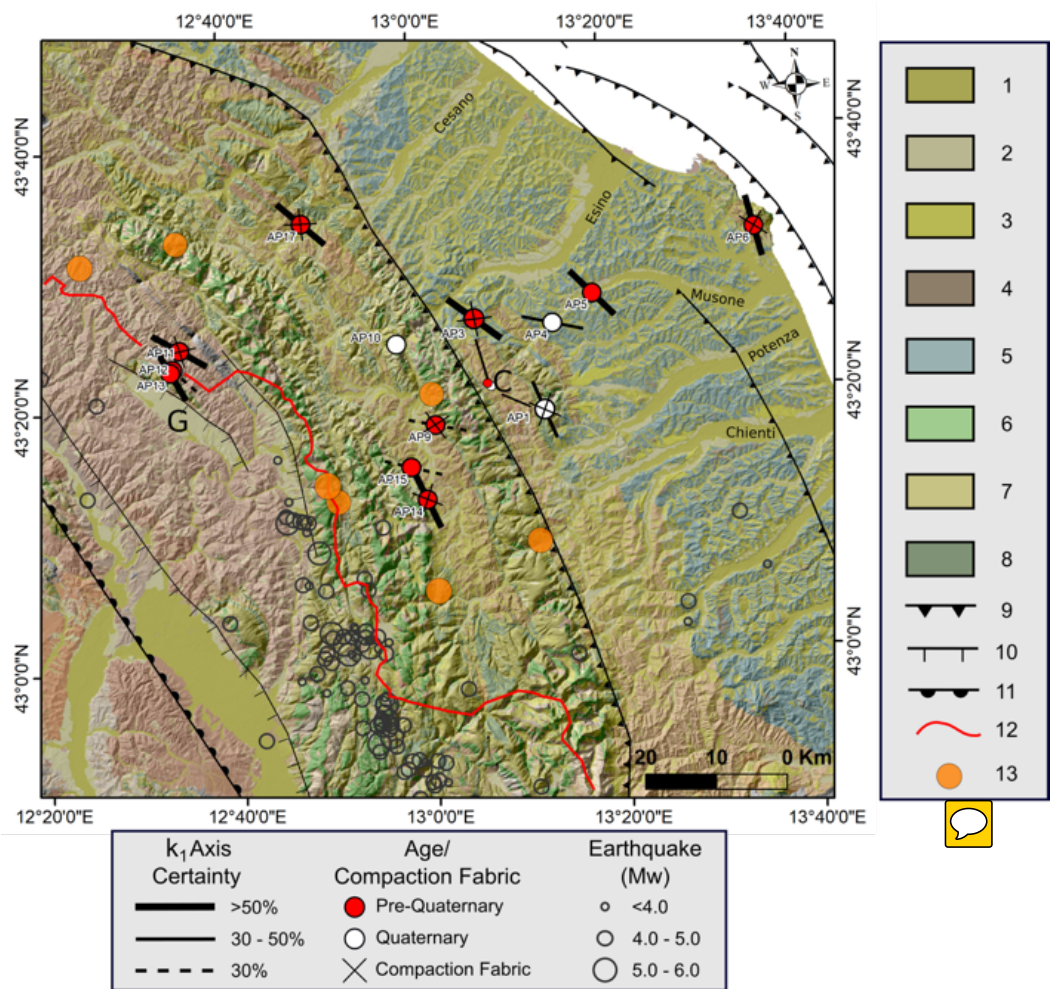

820  
821  
822  
823



Figure 11

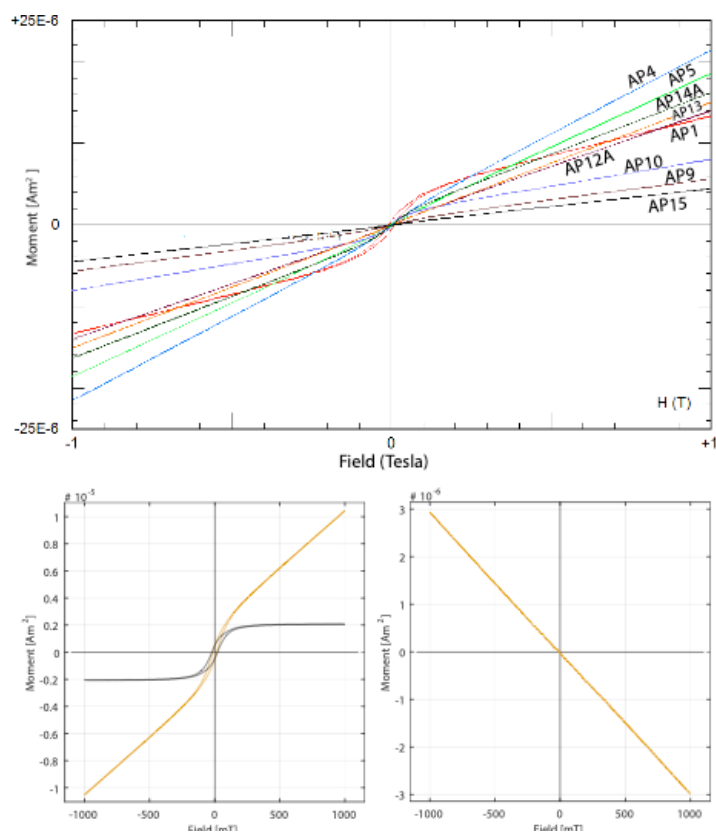

824  
 825  
 826



Figure 12

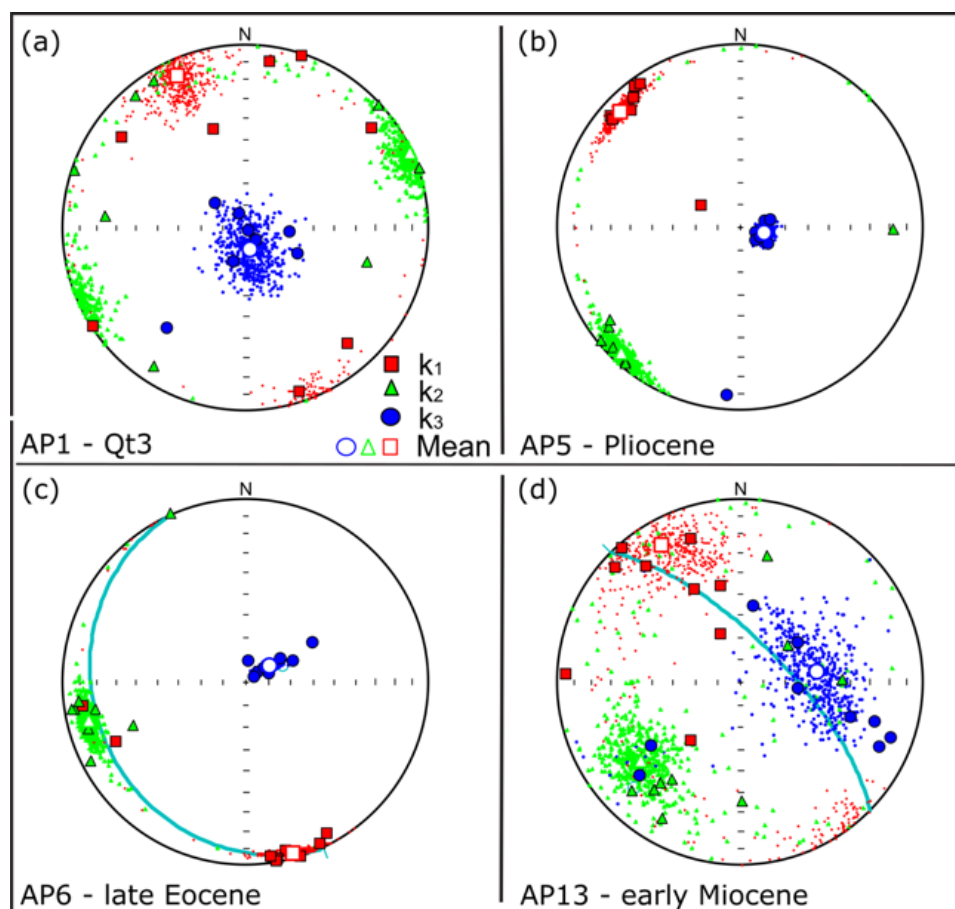

827  
 828  
 829



Figure 13

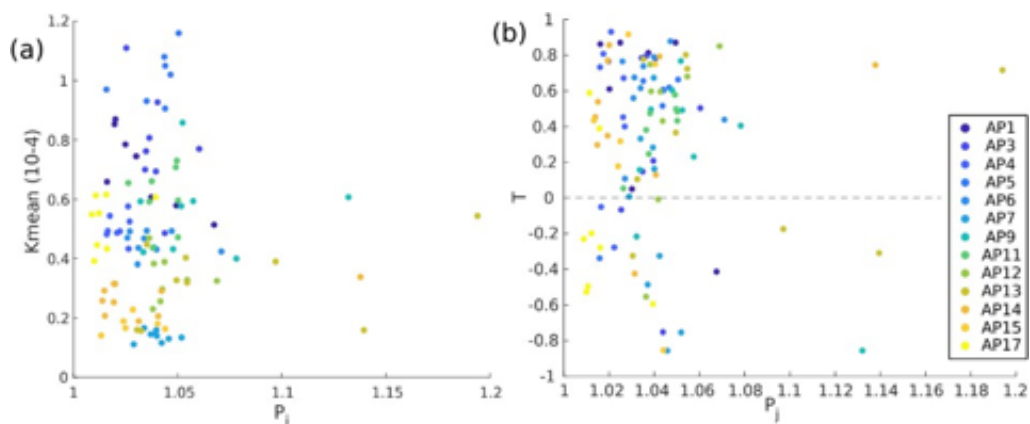

830  
 831
